# Supplementary material
Source: PubMed Central journal article supplement (PMC2932609)
Supplement: 0914785107_pnas.200914785SI.pdf [file 0914785107_pnas.200914785SI.pdf]

# Supporting Information

Conte et al. 10.1073/pnas.0914785107

## SI Materials and Methods

**Controls for Mo Injections.** The blocking efficiencies of Mo-miR-204-1 and Mo-miR-204-2 were verified using two different mRNA reporter approaches (Fig. S1 C–L). The first was a “direct assay,” which measured Mo interference with the translation of a reporter. The reporter was the 5′-UTR of the EGFP coding sequence fused to the stretch of ol-miR-204- and ol-miR-204-2 sequences complementary to those of the selected Mo (Fig. S1C). Injections of both Mo-miR-204-1 and Mo-miR-204-2 specifically abolished the EGFP signal (Fig. S1 D–G). In the second “blocking approach,” the selected Mo was tested for its efficiency of inhibition of the processing of miR-204 precursor sequences, which were inserted in the 3′-UTR of a destabilized d1-EGFP (Fig. S1H). Both Mos blocked maturation of the miR-204, maintaining the integrity of the 3′-UTR and the stability of the mRNA, and thus the expression of the d1-EGFP protein (Fig. S1 I–L). Control mm-Mo-miR-204 had no significant effects in these assays and did not affect endogenous miR-204 expression. Injections of both Mo-miR-204-1 and Mo-miR-204-2 resulted in significant down-regulation of miR-204 levels, as shown by RNA ISH (Fig. S1 A and B).

The efficacy of Meis2-TPmiR-204 Mo was tested using the direct assay (described above) and a “protection approach,” which measured the Mo interference with *Meis2* targeting by miR-204. In the latter approach, the reporter was the 3′-UTR of *olMeis2*, which was inserted downstream of the destabilized d1-EGFP reporter gene (Fig. S3A). Meis2-TPmiR-204 Mo injections protected the miR-204 target site of the d1-EGFP-*olMeis2*-3′-UTR reporter gene from miR-204 duplex binding (Fig. S3 B–E). The inhibitory efficiency of this Mo was measured by quantifying EGFP intensity, as reported previously (1), and with ImageJ (National Institutes of Health) analysis. Possible nonspecific effects of Meis2-TPmiR-204 were ruled out by coinjecting it with a Mo designed against p53, a key protein in the apoptotic pathway. Indeed, activation of p53 is an occasional off-targeting effect of Mo injections (2), which can be counteracted by injection of a p53 Mo. Consistent with the specificity of the Meis2-TPmiR-204-induced eye phenotype, both miR-204 and Mo-Meis2 injections were sufficient to rescue the lens and coloboma phenotypes (Fig. S2 P–U and Table S2).

1. Esteve P, Lopez-Rios J, Bovolenta P (2004) SFRP1 is required for the proper establishment of the eye field in the medaka fish. *Mech Dev* 121:687–701.

2. Robu ME, et al. (2007) p53 activation by knockdown technologies. *PLoS Genet* 3:e78.





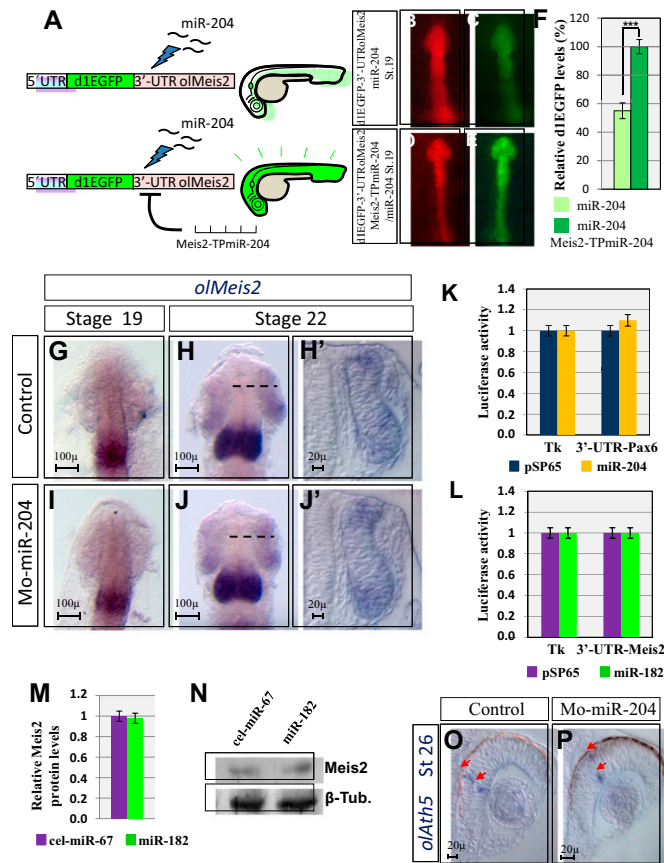

**Fig. S3.** *Meis2* is a specific miR-204 target. (A) Schematic representation of the protector assay to assess efficiency of the Meis2-TPmiR-204-Mo designed to block binding of miR-204 to its predicted target site in *Meis2* 3'-UTR (*SI Text*). (B–E) Representative embryos co-injected with the synthetic mRNA encoding the reporter d1GFP-3'-UTR-*olMeis2* construct and the miR-204 duplexes (B and C) or with miR-204 and Meis2-TPmiR-204 (D and E). (F) Efficiency of Meis2-TPmiR-204 inhibition of d1GFP repression when Mo and miR-204 mimic are co-injected in embryos at the one/two-cell stage (*SI Text*). \*\*\* $P < 0.0001$  ( $t$  tests). Red fluorescent protein serves as a control for the injection and is also used to normalize GFP fluorescence. Control (G–H') and Mo-miR-204-injected (I and J') embryos are hybridized in whole-mount RNA ISH with the *olMeis2* probe at St19 and St22 (as indicated). Note that morphology of the eye and levels of *olMeis2* expression in the lens placode and neuroretina are normal (H' and J'). (K–L) Relative Luc activities in H36CE cells are presented as fold differences in the Luc/Renilla ratios normalized to the Luc reporter constructs. Addition of miR-204 or miR-182 did not significantly decrease the Luc activity of the constructs containing the 3' UTR of *PAX6* (K) or *MEIS2* (L). Densitometric analysis (M) of Western blotting (N) shows that in H36CE cells, Meis2 protein levels are unaltered in the presence of miR-182 duplexes when compared with cel-miR-67 control transfections. Relative levels of the Meis2 protein measured 48 h after transfection of H36CE cells. Frontal sections of St24 control (O) and Mo-miR-204 (P)-injected embryos hybridized in whole-mount RNA ISH with the *olAth5* probe. Note that the early retinal ganglion cell marker *Ath5* was correctly expressed in miR-204 morphants at St26 (red arrows). (Scale bars: G, H, I, and J, 100  $\mu$ m; H', J', O, and P, 20  $\mu$ m.)





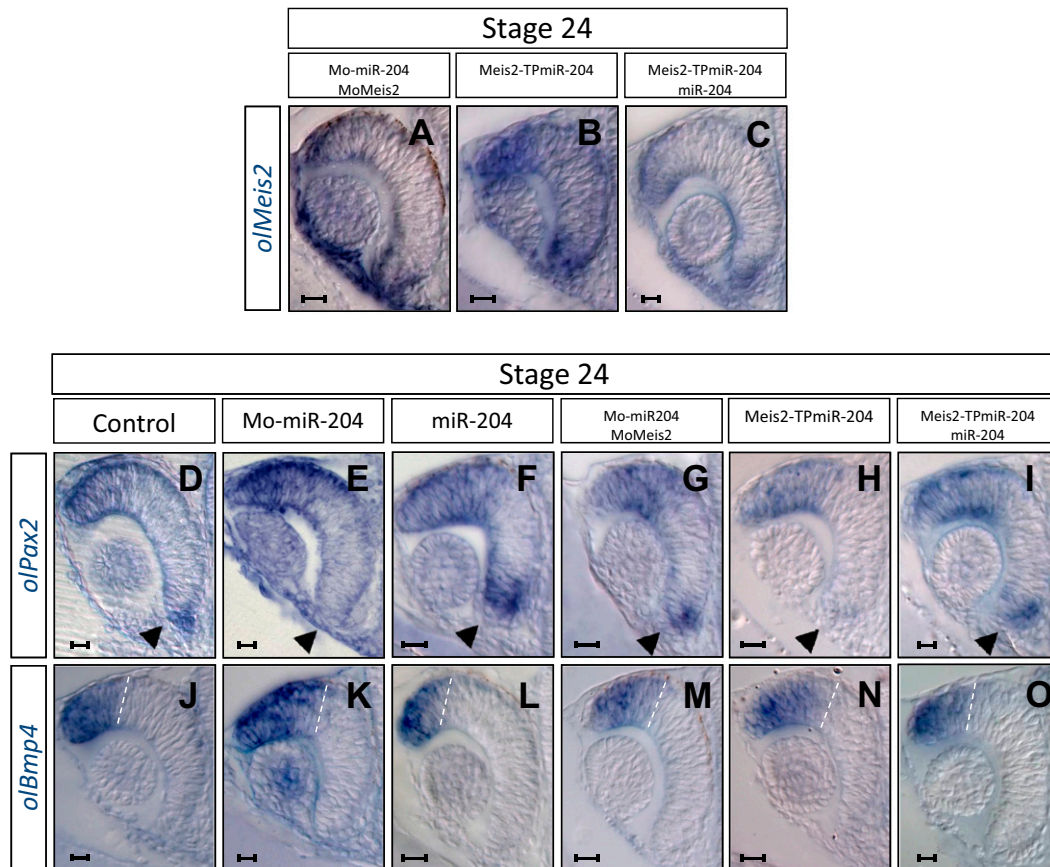

**Fig. 55.** miR-204 is required for maintenance of D-V eye polarity. Frontal sections of St24 Mo-Meis2/Mo-miR-204 (A), Meis2-TPmiR-204 (B), and Meis2-TPmiR-204/miR-204 (C)–injected embryos hybridized in whole-mount RNA ISH with the *o/Meis2* probe. Compare A–C with Fig. 1 H–J. Expression of *o/Meis2* (B) is up-regulated in the retina of Meis2-TPmiR-204 morphant embryos. Meis2-TPmiR-204/miR-204 coinjections restore correct expression of *o/Meis2*. (D–O) Control (D and J), Mo-miR-204 (E and K), miR-204 (F and L), Mo-Meis2/Mo-miR-204 (G and M), Meis2-TPmiR-204 (H and N), and Meis2-TPmiR-204/miR-204 (I and O)–injected embryos hybridized in whole-mount RNA ISH with probes specific for *o/Pax2* (D–I) and *o/Bmp4* (J–O). Expression of ventral *o/Pax2* gene is absent, whereas that of dorsal marker *o/Bmp4* is expanded ventrally in morphants (E, K, H, and N) when compared with control embryos (D and J). miR-204–overexpressing embryos show the opposite pattern of D-V marker expression (F and L). Alterations in D-V polarity are rescued by Mo-miR-204/Mo-Meis2 (G and M) and Meis2-TPmiR-204/miR-204 (I and O) coinjections. Arrowheads illustrate the ventral *o/Pax2* expression domain in the retina. Broken lines illustrate the ventral-most boundary of *o/Bmp4* expression domain in the retina. (Scale bars: 20  $\mu$ m.)

**Table S1. Sequences of Mos and oligonucleotides used to generate constructs and RNA ISH templates or to carry out qRT-PCR**

| Name                           | Sequence                                | Concentration used, mM |
|--------------------------------|-----------------------------------------|------------------------|
| <b>Mos</b>                     |                                         |                        |
| Mo-olmiR-204-1                 | 5'-TTGATTCCAGGCATAGGATGACAAAGGGAAG-3'   | 0.09                   |
| Mo-olmiR-204-2                 | 5'-CAAGCTCCAGGCATAGGATGACAAAGGGAAG-3'   | 0.09                   |
| mmMo-olmiR-204                 | 5'-TTCATTGCAGCCATAGCATGAGAAAGCGAAG-3'   | 0.09                   |
| Mo-olp53                       | 5'-CGGGAATCGCACCAGACAACAATACG-3'        | 0.09                   |
| Mo-olMeis2                     | 5'-GCGCTCCAATAAACTCCCGAATATG-3'         | 0.03                   |
| Meis2-TPmiR-204                | 5'- CCTGTTGTGGTAACAAAGTCCCTT-3'         | 0.09                   |
| <b>Oligonucleotide primers</b> |                                         |                        |
| Control-Mo204/F                | GATCCCTTCCCTTTGTCATCTATGCCTGGAATCAAGCC  |                        |
| Control-Mo204/R                | CATGGGCTTGATTCCAGGCATAGGATGACAAAGGGAAGG |                        |
| Pax6-3'-UTR-SpeI/F             | GACTAGTTTGTGTTAATTCAGTCAGTGAC           |                        |
| Pax6-3'-UTR-SpeI/R             | GACTAGTAAATACAAAGGCTTTGGCATG            |                        |
| Meis2-3'-UTR-XbaI/F            | GCTCTAGATATAAGGGAACTCAAGGGAA            |                        |
| Meis2-3'-UTR-XbaI/R            | GCTCAGACATAACGTACAGTCCTCAT              |                        |
| olMeis2-3'-UTR-XbaI/F          | TGCACTGCAGTGCAAGTACTGGAGGACAAGGCAT      |                        |
| olMeis2-3'-UTR-XbaI/R          | TGCACTGCAGTGCAAGTACTGGAGGACAAGGCAT      |                        |
| hsa-premiR-204-BglII/F         | GAAGATCTCAGGGTGATGGAAAGGAGG             |                        |
| hsa-premiR-204-XhoI/R          | CCGCTCGAGCATGTATGGAAATCCCAATGC          |                        |
| hsa-premiR-182/F               | gaagatctcatcctaactgtctctgtct            |                        |
| hsa-premiR-182/R               | ccgctcgagtcctcgcgagaaacagcagg           |                        |
| ol-premiR-204-1-PstI/F         | AAAAGTGCAGGGTGTTTCAGTATTGCTTCTAG        |                        |
| ol-premiR-204-1-NsiI/R         | TGCATGCATTTAAAGATGACGACACGTGC           |                        |
| ol-premiR-204-2-PstI/F         | AACTGCAGGGAGAAAGCATATCTCTCTGCA          |                        |
| ol-premiR-204-2-NsiI/R         | TGCATGCATCCGAGCAGTTTGTAACCATGT          |                        |
| ACRYSTALLIN forward            | CGTGAAGGTGATCGATGACT                    |                        |
| ACRYSTALLIN reverse            | AGCAGTCCATCGGCAGACA                     |                        |
| Prox1 forward                  | ATCTCACCTTACTCAGGCAG                    |                        |
| Prox1 reverse                  | TAAGCATGTTGGAGCTTGGG                    |                        |
| Meis2 forward                  | AGTACTGGAGGACAAGGCAT                    |                        |
| Meis2 reverse                  | AAATAGGATTTGTCAGGCTGC                   |                        |
| Pax6 forward                   | GGGAGAAAACACCAACTCCA                    |                        |
| Pax6 reverse                   | ACATCCGGGTAATGGGTTCT                    |                        |
| Hprt forward                   | CTGAACAGGAACAGCGACC                     |                        |
| Hprt reverse                   | TGAGGAGCTCCAATAACGTC                    |                        |
| Gapdh forward                  | CGGCAAGCTGATAGTCGATG                    |                        |
| Gapdh reverse                  | AGAAACTCCGGTGGACTC                      |                        |
